# Supplementary material
Source: publisher figshare collection journal article supplement (https://acs.figshare.com/ndownloader/files/20046587)
Supplement: Supplementary file 1 [file 20046587]

## Supporting Information

### **Fluorescence Turn-On Response Amplified by Space Confinement in Metal-Organic Frameworks**

*Xue-Mei Yin, Lu-Lu Gao, Peng Li, Ran Bu, Weng-Jie Sun and En-Qing Gao\**

Shanghai Key Laboratory of Green Chemistry and Chemical Processes, School of Chemistry and Molecular Engineering, East China Normal University, Shanghai 200062 (P. R. China).

\*corresponding author. Email: [eqgao@chem.ecnu.edu.cn](mailto:eqgao@chem.ecnu.edu.cn)

## Physical Measurements

$^1\text{H}$  NMR spectra were recorded on a Bruker Advance 400 MHz spectrometer. The FT-IR spectra were recorded in the range  $500\text{--}4000\text{ cm}^{-1}$  using KBr pellets on a Nicolet NEXUS 670 spectrophotometer. Powder X-ray diffraction (PXRD) at ambient pressure was recorded on a Rigaku D/Max-2500 diffractometer at 35kV, 25mA for a Cu-target tube and a graphite monochromator. UV-vis diffuse reflectance spectra were measured using a SHIMADZU UV-2700 spectrophotometer, with  $\text{BaSO}_4$  plates as references (100% reflection). Liquid phase fluorescence spectra were recorded on a Hitachi F-4500 spectrofluorometer. Solid fluorescence spectra were obtained using a SHIMADZU RF-6000 spectrofluorometer. Scanning electron microscopy (SEM) was performed on a Hitachi S-4800 microscope. Nitrogen adsorption and desorption isotherm measurements were performed on a Micromeritics ASAP2020 analyzer at 77K. Thermal gravimetric analysis (TGA) was performed on a STA 449 F3 Simultaneous Thermal Analyzer in flowing air at  $10^\circ\text{C}/\text{min}$ .

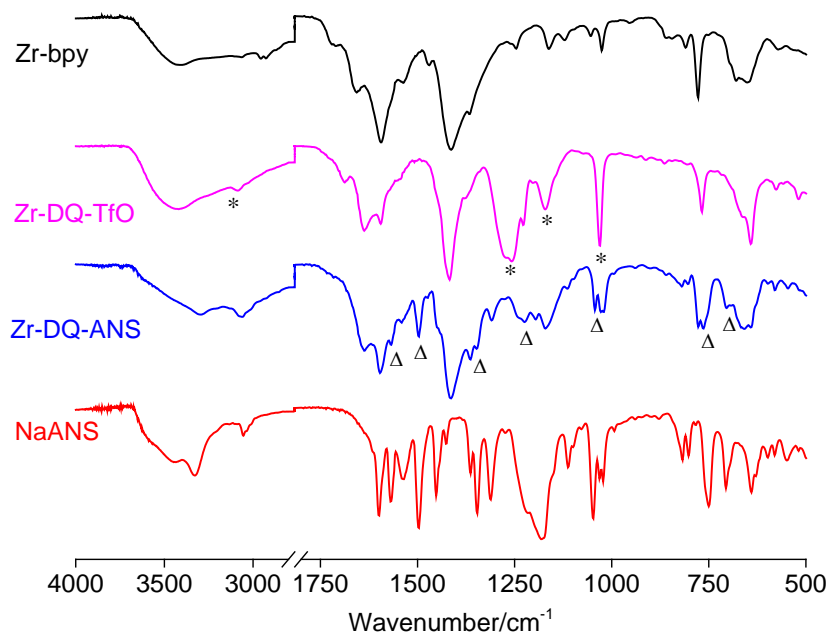

**Figure S1.** IR spectra of NaANS,, Zr-bpy, Zr-DQ-TfO, and Zr-DQ-ANS. The bands marked with \* are new bands of Zr-DQ-TfO compared with Zr-bpy, and those marked with  $\Delta$  are the bands arising from the  $\text{ANS}^-$  anion, assigned in comparison with the spectrum of NaANS.

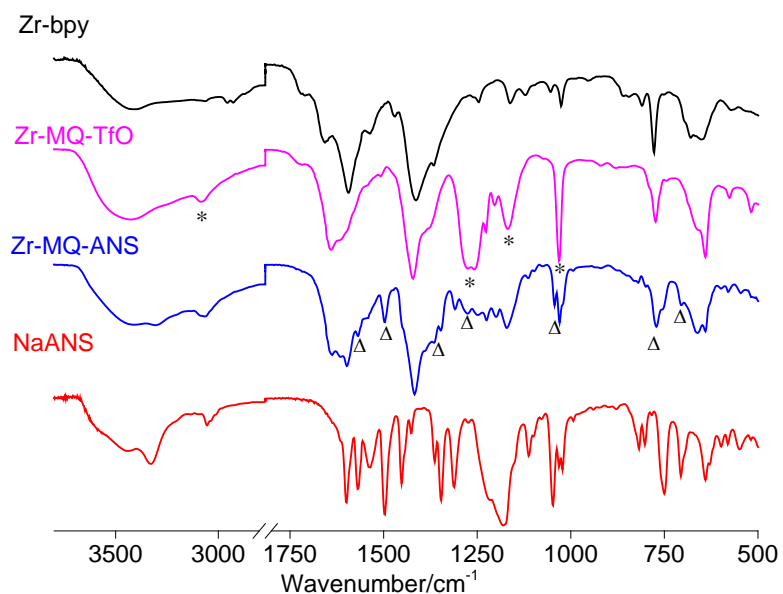

**Figure S2.** IR spectra of NaANS, Zr-bpy, Zr-MQ-TfO, and Zr-MQ-ANS. The bands marked with \* are new bands of Zr-MQ-TfO compared with Zr-bpy, and those marked with  $\Delta$  are the bands arising from the  $\text{ANS}^-$  anion, assigned in comparison with the spectrum of NaANS.

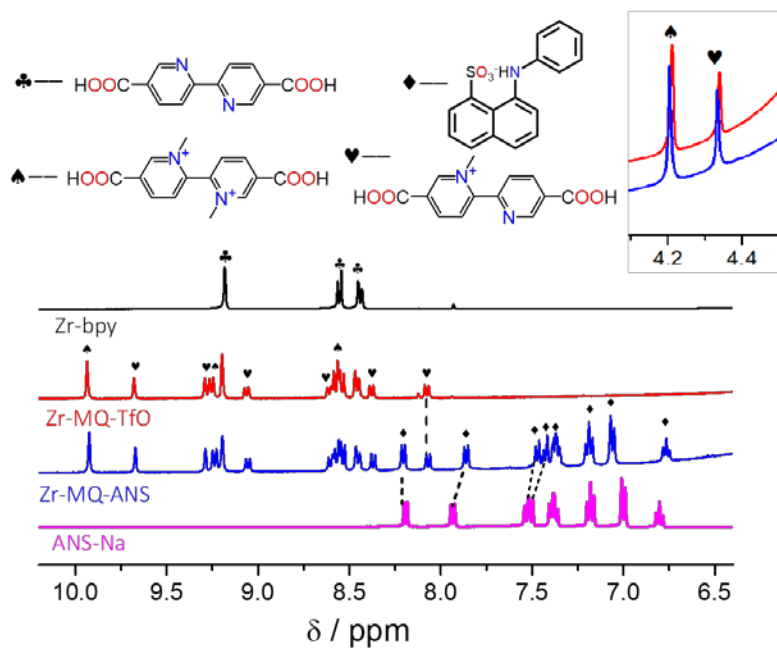

**Figure S3.**  $^1\text{H}$  NMR spectra of Zr-DQ-TfO (magenta, N-alkylation ratio: 43%) and Zr-DQ-ANS (blue). The spectra were recorded with the solutions obtained by digesting the solids with HF (aq.)/ $\text{d}_6$ -DMSO (1/40, v/v).

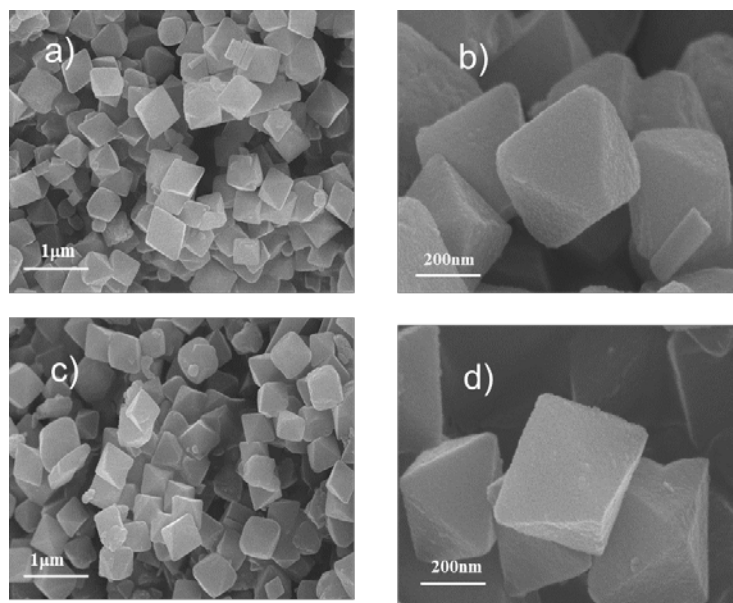

**Figure S4.** SEM images of Zr-MQ-TfO (a, b) and Zr-MQ-ANS (c, d).

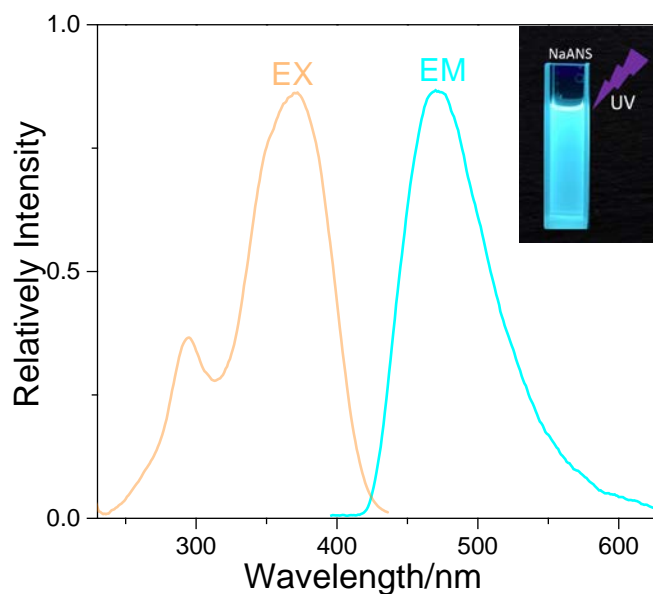

**Figure S5.** The excitation and emission spectra of NaANS in 1,4-dioxane (0.1  $\mu\text{M}$ ).

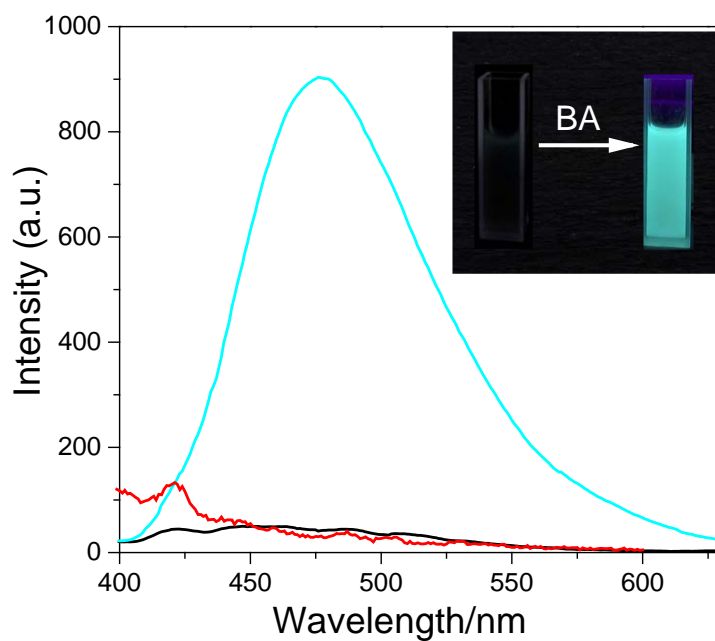

**Figure S6.** Emission spectra of Zr-MQ-TfO (red), Zr-MQ-ANS (black) dispersions in 1,4-dioxane and that of the Zr-MQ-ANS dispersion after addition of butylamine (BA, 10  $\mu\text{M}$ ) (cyan). The inset displays the BA-induced fluorescence turn-on of the Zr-MQ-ANS suspension under UV light (365 nm).

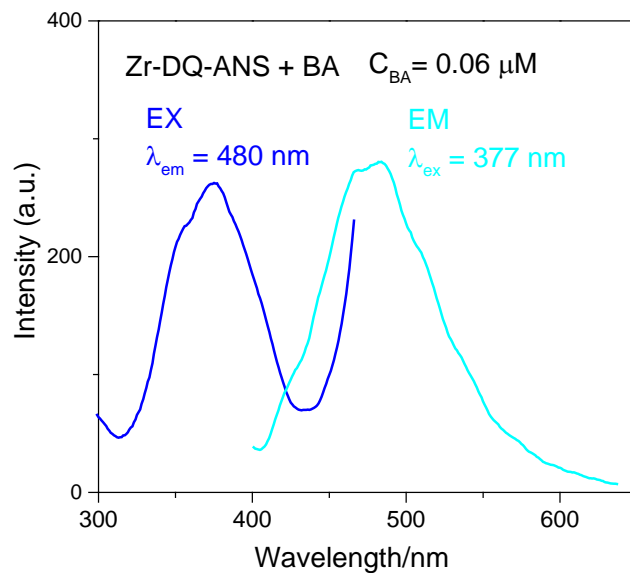

**Figure S7.** The excitation (blue) and emission spectra (cyan) of Zr-DQ-ANS. ( $C_{BA}=0.06\mu\text{M}$ ).

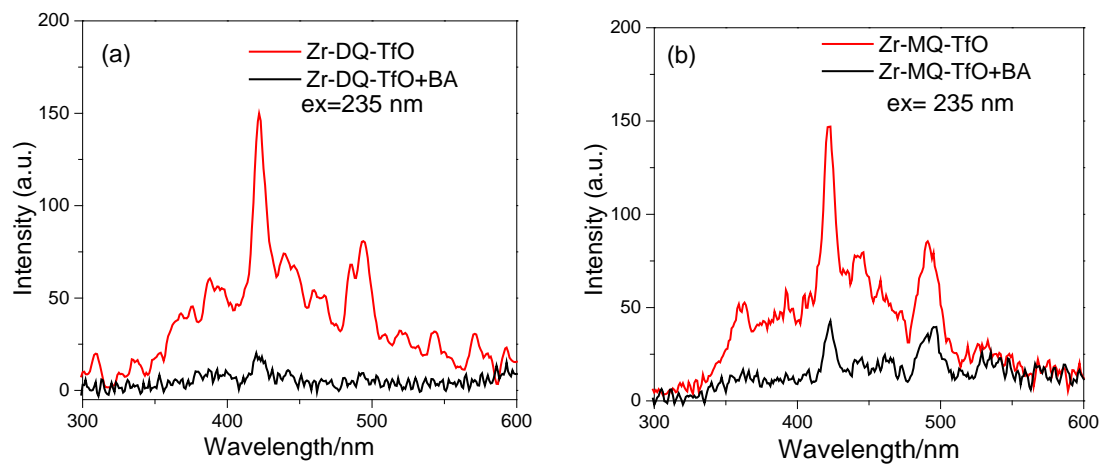

**Figure S8.** The emission spectra of Zr-DQ-TfO (a) and Zr-MQ-TfO (b) suspensions before and after addition of BA (0.1 M).

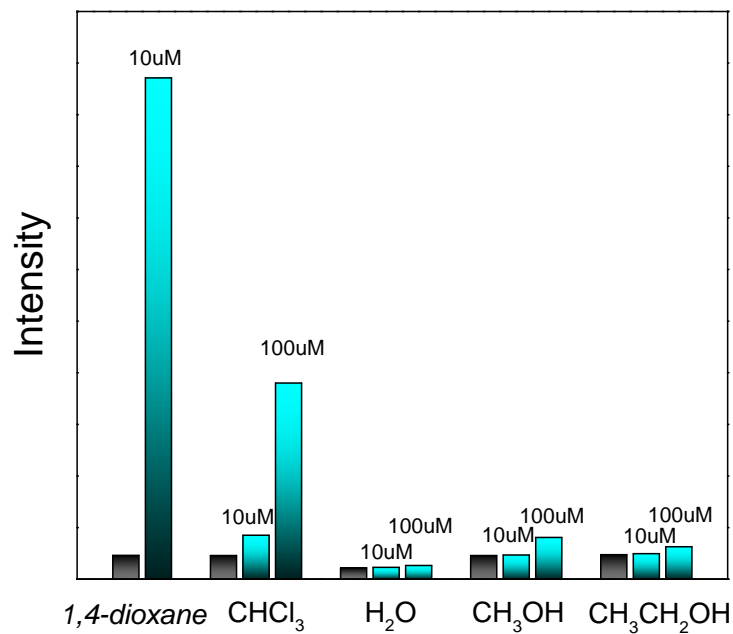

**Figure S9.** Luminescence intensities of Zr-DQ-ANS suspensions in different solvents in the absence (grey) and presence (cyan) of BA at the specified concentrations.

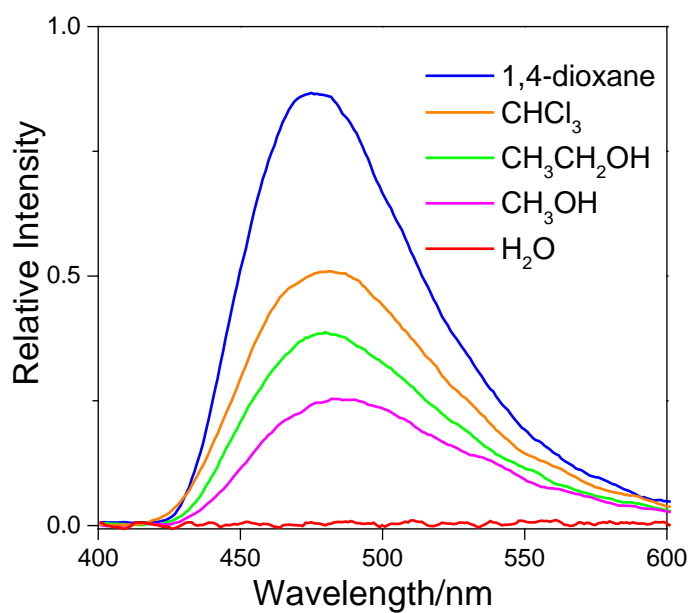

**Figure S10.** The emission spectra of NaANS in different solvents ( $\lambda_{\text{ex}}=377$  nm).

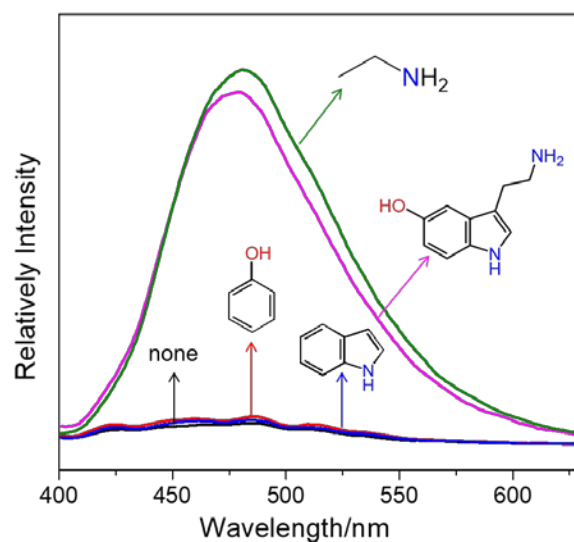

**Figure S11.** Emission spectra of the Zr-DQ-ANS dispersions in response to phenol, indole ethylamine and 5-HT (10  $\mu$ M).

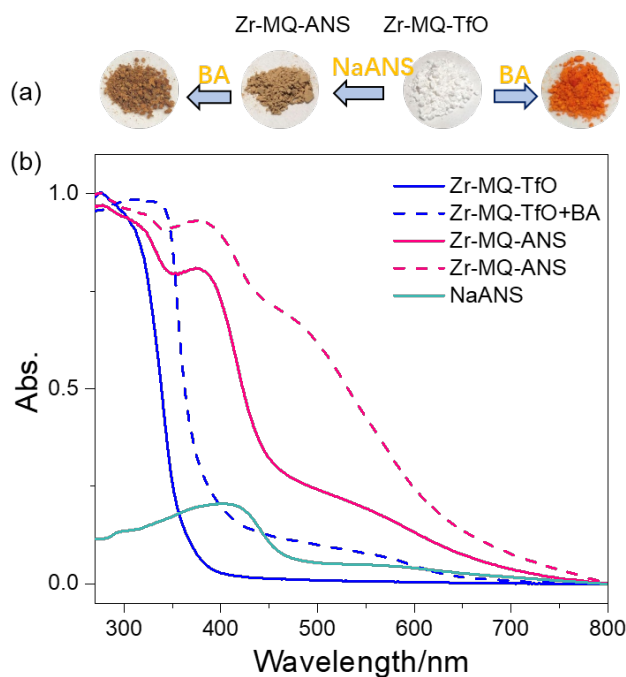

**Figure S12.** (a) Photographs showing the color changes before and after treating Zr-DQ-TfO and Zr-DQ-ANS with pure BA. (b) Normalized solid-state UV-vis spectra of Zr-DQ-TfO and Zr-DQ-ANS before (solid lines) and after (dashed lines) BA treatment. For comparison, the spectrum of NaANS is included.



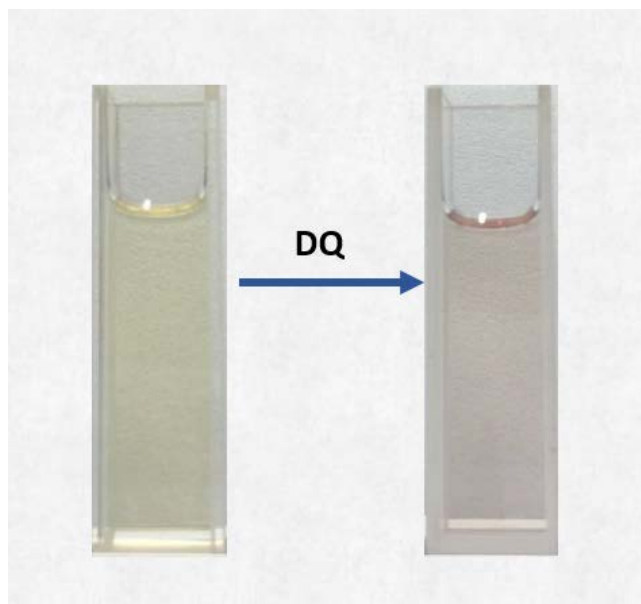

**Figure S13.** Photograph of color change before and after addition of  $[\text{Me}_2\text{DQdc}]^{2+}$  to NaANS 1,4-dioxane solution.

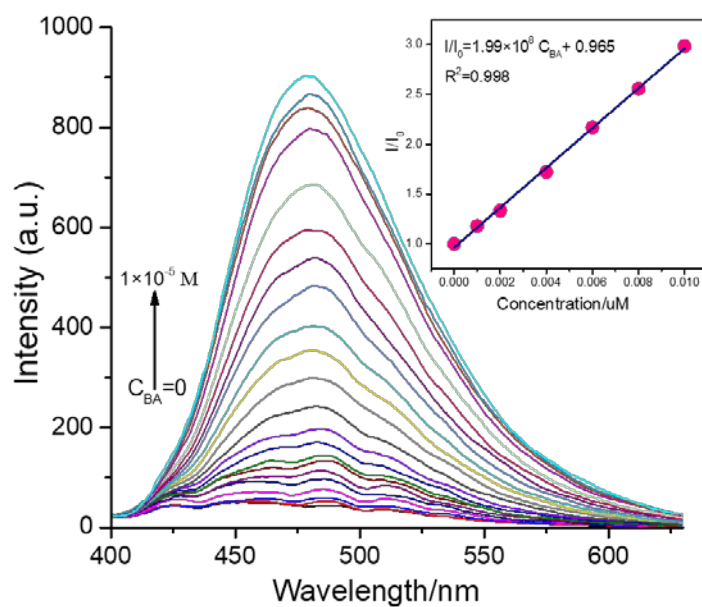

**Figure S14.** Emission spectra of the Zr-MQ-ANS dispersion in presence of different BA concentrations ( $\lambda_{\text{ex}} = 377 \text{ nm}$ ). Inset: linear variation of  $I/I_0$  (at 480 nm) with BA concentration in the low concentration region.

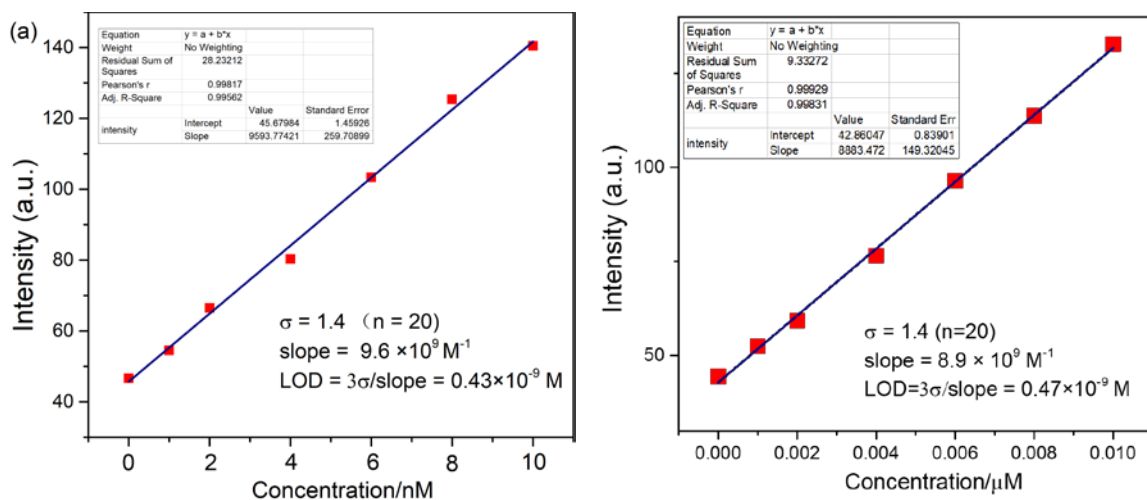

**Figure S15.** Data for calculations of LODs. The linear fit of the intensity-concentration data in low butylamine concentration range is shown. Left: Zr-DQ-ANS. Right: Zr-MQ-ANS.

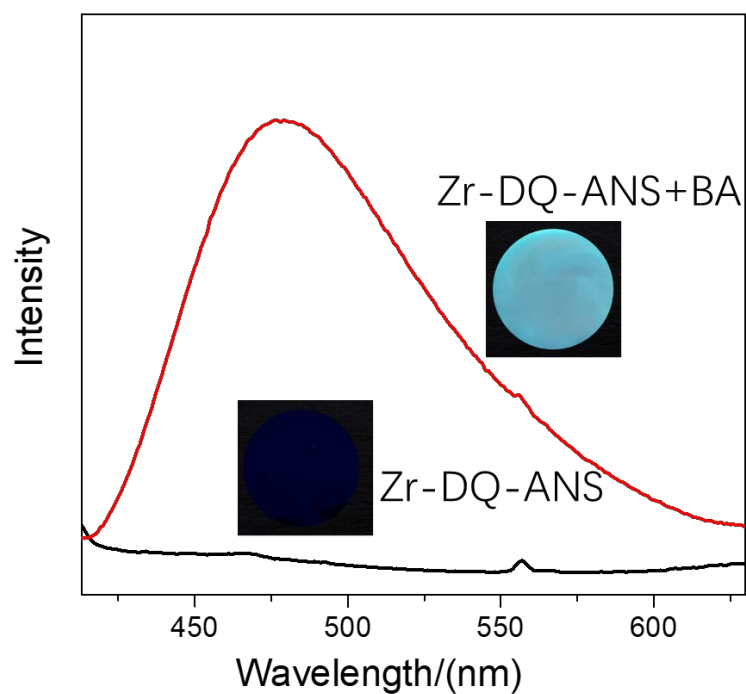

**Figure S16.** Solid-state emission spectra of Zr-DQ-ANS before (black) and after (blue) exposure to butylamine (BA) ( $\lambda_{\text{ex}} = 377 \text{ nm}$ ).

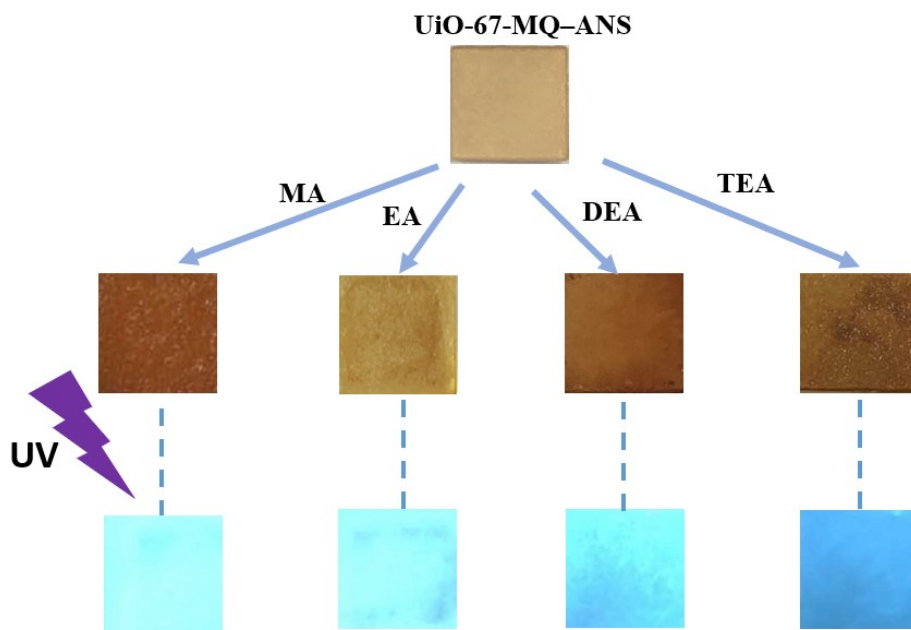

**Figure S17.** Photographs of the quartz slide supported Zr-MQ-ANS layers before and after treated with different amines: top and middle, under natural lights; bottom, under UV light (365nm). MA = methylamine, EA = ethylamine, DEA = diethylamine, TEA = triethylamine.

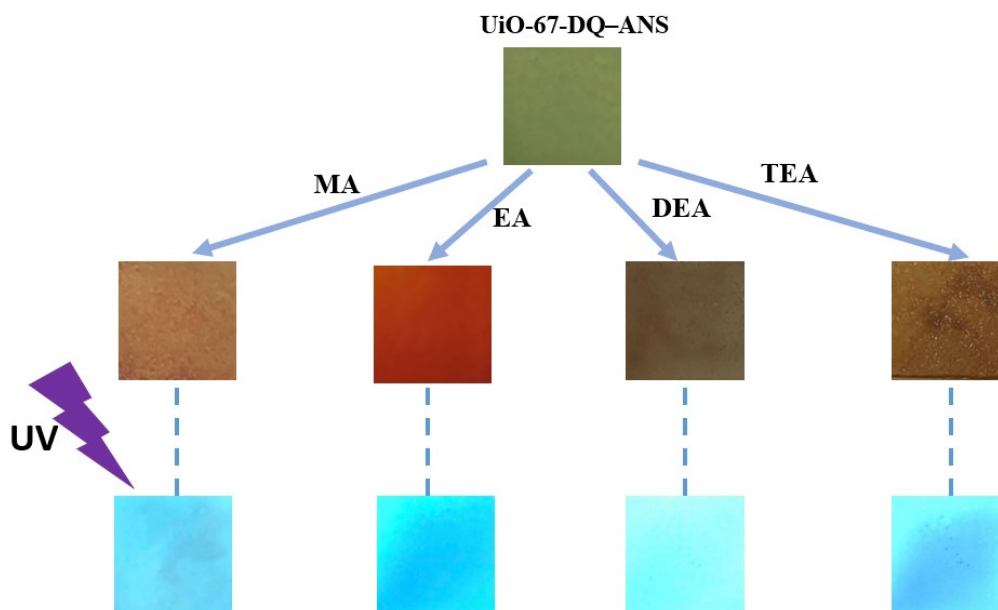

**Figure S18.** Photographs of Zr-DQ-ANS encounters different amines resulting in color changes and fluorescence under UV light (365nm). MA = methylamine, EA = ethylamine, DEA = diethylamine, TEA = triethylamine.
